# Supplementary material for: Impact of an Extreme Winter Storm Event on the Coagulation/Flocculation Processes in a Prototype Surface Water Treatment Plant: Causes and Mitigating Measures
Source: MDPI journal article supplement (doi:10.3390/ijerph16152808), 2019-08-06
Supplement: s1 [file s1]

# Supporting Information

## Impact of an Extreme Winter Storm Event on the Coagulation/Flocculation Processes in a Prototype Surface Water Treatment Plant: Causes and Mitigating Measures

Fuguo Qiu <sup>1,2</sup>, Huadong Lv <sup>1</sup>, Xiao Zhao <sup>2,3,\*</sup> and Dongye Zhao <sup>2,\*</sup>

<sup>1</sup> Key Laboratory of Urban Stormwater System and Water Environment (The Ministry of Education of China), Beijing University of Civil Engineering and Architecture, Beijing 100044, China

<sup>2</sup> Environmental Engineering Program, Department of Civil Engineering, 238 Harbert Engineering Center, Auburn University, Auburn, AL 36849, USA

<sup>3</sup> College of Water Resources & Civil Engineering, China Agricultural University, Beijing 100083, China

\* Correspondence: xiaozhao88@cau.edu.cn (X.Z.); zhaodon@auburn.edu (D.Z.); Tel.: +86-10-62736533 (X.Z.); +1-334-844-6277 (D.Z.)

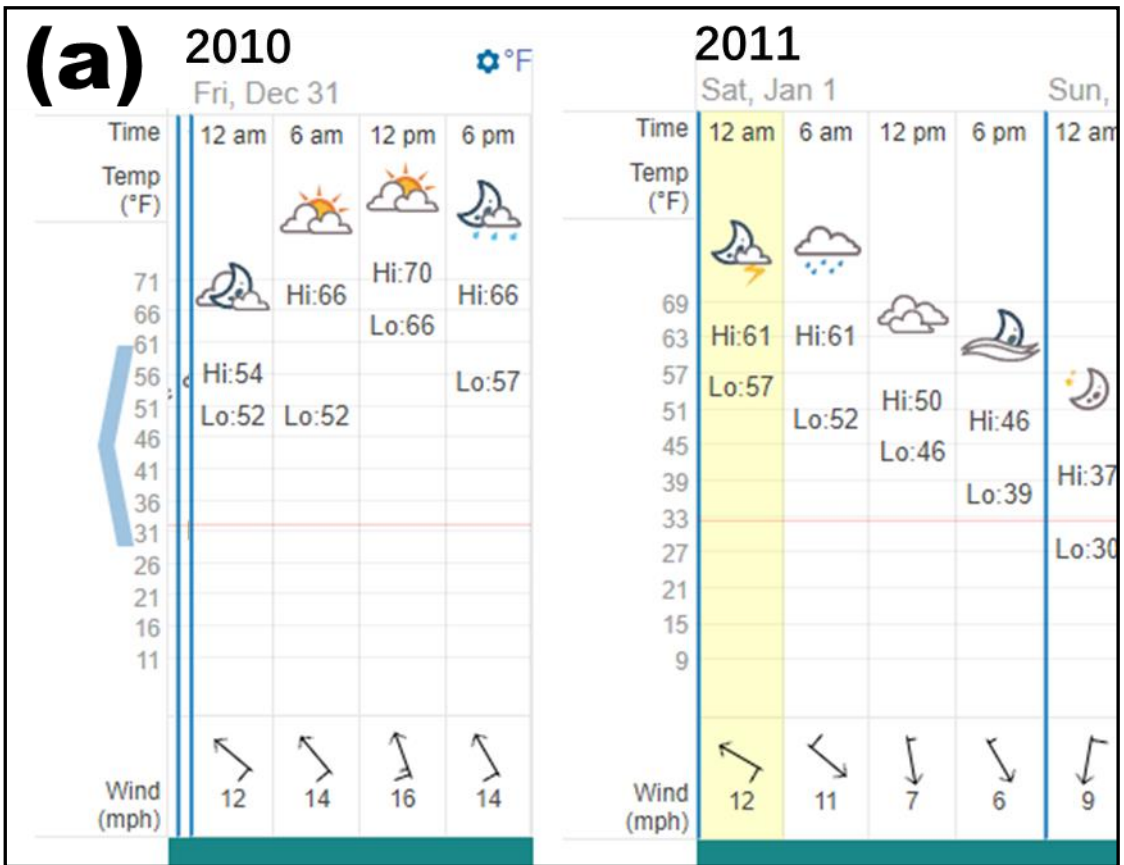

**(b)**

## City of Decatur Weather History for December 31, 2010

Show weather for: December 31, 2010 

| Time                    | Conditions                                                                          | Conditions |                            | Comfort |                                                                                          |           | Barometer | Visibility |
|-------------------------|-------------------------------------------------------------------------------------|------------|----------------------------|---------|------------------------------------------------------------------------------------------|-----------|-----------|------------|
|                         |                                                                                     | Temp       | Weather                    | Wind    | Humidity                                                                                 |           |           |            |
| 12:02 am<br>Fri, Dec 31 |    | 54 °F      | Light rain. Mostly cloudy. | 9 mph   |  67%   | 30.03 "Hg | 10 mi     |            |
| 12:53 am                |    | 54 °F      | Overcast.                  | 17 mph  |  69%   | 30.02 "Hg | 10 mi     |            |
| 1:53 am                 |    | 52 °F      | Overcast.                  | 14 mph  |  72%   | 30.03 "Hg | 10 mi     |            |
| 2:53 am                 |    | 52 °F      | Overcast.                  | 12 mph  |  72%   | 30.02 "Hg | 10 mi     |            |
| 3:53 am                 |    | 51 °F      | Overcast.                  | 13 mph  |  71%   | 30.01 "Hg | 10 mi     |            |
| 4:53 am                 |    | 52 °F      | Overcast.                  | 10 mph  |  72%   | 30.03 "Hg | 10 mi     |            |
| 5:53 am                 |    | 52 °F      | Overcast.                  | 10 mph  |  72%   | 30.04 "Hg | 10 mi     |            |
| 6:53 am                 |    | 52 °F      | Overcast.                  | 8 mph   |  72%   | 30.06 "Hg | 10 mi     |            |
| 7:53 am                 |    | 54 °F      | Overcast.                  | 13 mph  |  74%   | 30.07 "Hg | 10 mi     |            |
| 8:53 am                 |    | 55 °F      | Overcast.                  | 10 mph  |  74%   | 30.09 "Hg | 10 mi     |            |
| 9:53 am                 |    | 58 °F      | Mostly cloudy.             | 12 mph  |  70%   | 30.10 "Hg | 10 mi     |            |
| 10:53 am                |    | 61 °F      | Broken clouds.             | 16 mph  |  67%   | 30.07 "Hg | 10 mi     |            |
| 11:53 am                |    | 66 °F      | Partly sunny.              | 22 mph  |  61%   | 30.02 "Hg | 10 mi     |            |
| 12:53 pm                |   | 68 °F      | Partly sunny.              | 20 mph  |  57%   | 29.98 "Hg | 10 mi     |            |
| 1:53 pm                 |  | 69 °F      | Partly sunny.              | 15 mph  |  55% | 29.97 "Hg | 10 mi     |            |
| 2:53 pm                 |  | 69 °F      | Partly sunny.              | 14 mph  |  55% | 29.96 "Hg | 10 mi     |            |
| 3:53 pm                 |  | 68 °F      | Overcast.                  | 15 mph  |  55% | 29.95 "Hg | 10 mi     |            |
| 4:53 pm                 |  | 68 °F      | Overcast.                  | 16 mph  |  55% | 29.96 "Hg | 10 mi     |            |
| 5:53 pm                 |  | 67 °F      | Overcast.                  | 15 mph  |  59% | 29.98 "Hg | 10 mi     |            |
| 6:53 pm                 |  | 67 °F      | Overcast.                  | 17 mph  |  59% | 29.98 "Hg | 10 mi     |            |
| 7:53 pm                 |  | 65 °F      | Light rain. Mostly cloudy. | 17 mph  |  66% | 29.99 "Hg | 10 mi     |            |
| 9:03 pm                 |  | 61 °F      | Heavy rain. Fog.           | 15 mph  |  83% | 30.00 "Hg | 4 mi      |            |
| 9:53 pm                 |  | 59 °F      | Light rain. Mostly cloudy. | 10 mph  |  90% | 29.99 "Hg | 10 mi     |            |
| 10:53 pm                |  | 58 °F      | Rain. Fog.                 | 15 mph  |  93% | 29.94 "Hg | 6 mi      |            |
| 11:02 pm                |  | 57 °F      | Light rain. Mostly cloudy. | 12 mph  |  94% | 29.98 "Hg | 8 mi      |            |

**(c)**

## City of Decatur Weather History for January 1, 2011

Show weather for: January 1, 2011

| Time                   | Conditions |                           |         | Comfort  |           |            |  |
|------------------------|------------|---------------------------|---------|----------|-----------|------------|--|
|                        | Temp       | Weather                   | Wind    | Humidity | Barometer | Visibility |  |
| 12:00 am<br>Sat, Jan 1 | 57 °F      | Strong thunderstorms. Fog | 7 mph   | 94%      | 29.93 "Hg | 1 mi       |  |
| 12:10 am               | 57 °F      | Strong thunderstorms. Fog | 15 mph  | 94%      | 29.93 "Hg | 2 mi       |  |
| 12:53 am               | 57 °F      | Light rain. Fog           | 15 mph  | 93%      | 29.86 "Hg | 6 mi       |  |
| 2:05 am                | 57 °F      | Strong thunderstorms. Fog | 13 mph  | 94%      | 29.85 "Hg | 6 mi       |  |
| 2:53 am                | 57 °F      | Strong thunderstorms. Fog | 9 mph   | 94%      | 29.88 "Hg | 1 mi       |  |
| 3:56 am                | 57 °F      | Strong thunderstorms. Fog | 12 mph  | 100%     | 29.88 "Hg | 3 mi       |  |
| 4:05 am                | 57 °F      | Strong thunderstorms. Fog | 13 mph  | 100%     | 29.88 "Hg | 5 mi       |  |
| 4:53 am                | 59 °F      | Rain. Fog                 | 13 mph  | 100%     | 29.87 "Hg | 6 mi       |  |
| 6:00 am                | 61 °F      | Thunderstorms. Fog        | 16 mph  | 94%      | 29.89 "Hg | 5 mi       |  |
| 6:53 am                | 59 °F      | Overcast                  | 6 mph   | 96%      | 29.89 "Hg | 10 mi      |  |
| 7:55 am                | 61 °F      | Rain. Overcast            | 12 mph  | 94%      | 29.91 "Hg | 1 mi       |  |
| 8:10 am                | 61 °F      | Rain. Mostly cloudy       | 6 mph   | 94%      | 29.92 "Hg | 2 mi       |  |
| 9:04 am                | 55 °F      | Light rain. Fog           | 18 mph  | 94%      | 29.94 "Hg | 3 mi       |  |
| 9:53 am                | 53 °F      | Light rain. Fog           | 8 mph   | 96%      | 29.97 "Hg | 3 mi       |  |
| 10:53 am               | 52 °F      | Fog                       | 9 mph   | 93%      | 30.01 "Hg | 5 mi       |  |
| 11:53 am               | 51 °F      | Fog                       | 15 mph  | 96%      | 30.00 "Hg | 2 mi       |  |
| 12:53 pm               | 50 °F      | Mostly cloudy             | 14 mph  | 89%      | 30.04 "Hg | 10 mi      |  |
| 1:53 pm                | 50 °F      | Overcast                  | 8 mph   | 71%      | 30.05 "Hg | 10 mi      |  |
| 2:53 pm                | 50 °F      | Overcast                  | 10 mph  | 62%      | 30.05 "Hg | 10 mi      |  |
| 3:53 pm                | 50 °F      | Overcast                  | 6 mph   | 59%      | 30.06 "Hg | 10 mi      |  |
| 4:53 pm                | 49 °F      | Mostly cloudy             | 5 mph   | 59%      | 30.07 "Hg | 10 mi      |  |
| 5:53 pm                | 46 °F      | Passing clouds            | No wind | 76%      | 30.12 "Hg | 10 mi      |  |
| 6:53 pm                | 46 °F      | Passing clouds            | 6 mph   | 71%      | 30.13 "Hg | 10 mi      |  |
| 7:53 pm                | 44 °F      | Clear                     | 6 mph   | 71%      | 30.13 "Hg | 10 mi      |  |
| 8:53 pm                | 44 °F      | Clear                     | 6 mph   | 68%      | 30.14 "Hg | 10 mi      |  |
| 9:53 pm                | 42 °F      | Passing clouds            | 5 mph   | 73%      | 30.16 "Hg | 10 mi      |  |
| 10:53 pm               | 41 °F      | Passing clouds            | 8 mph   | 70%      | 30.16 "Hg | 10 mi      |  |
| 11:53 pm               | 39 °F      | Clear                     | 7 mph   | 67%      | 30.16 "Hg | 10 mi      |  |

**Figure S1.** Weather History of Decatur, AL, USA (a) weather graph, (b) weather history for Dec.

31, 2010 and (c) weather history for Jan. 1, 2011 (Information from the Website:

<https://www.timeanddate.com/weather/@7317841/historic?month=11&year=2010>).

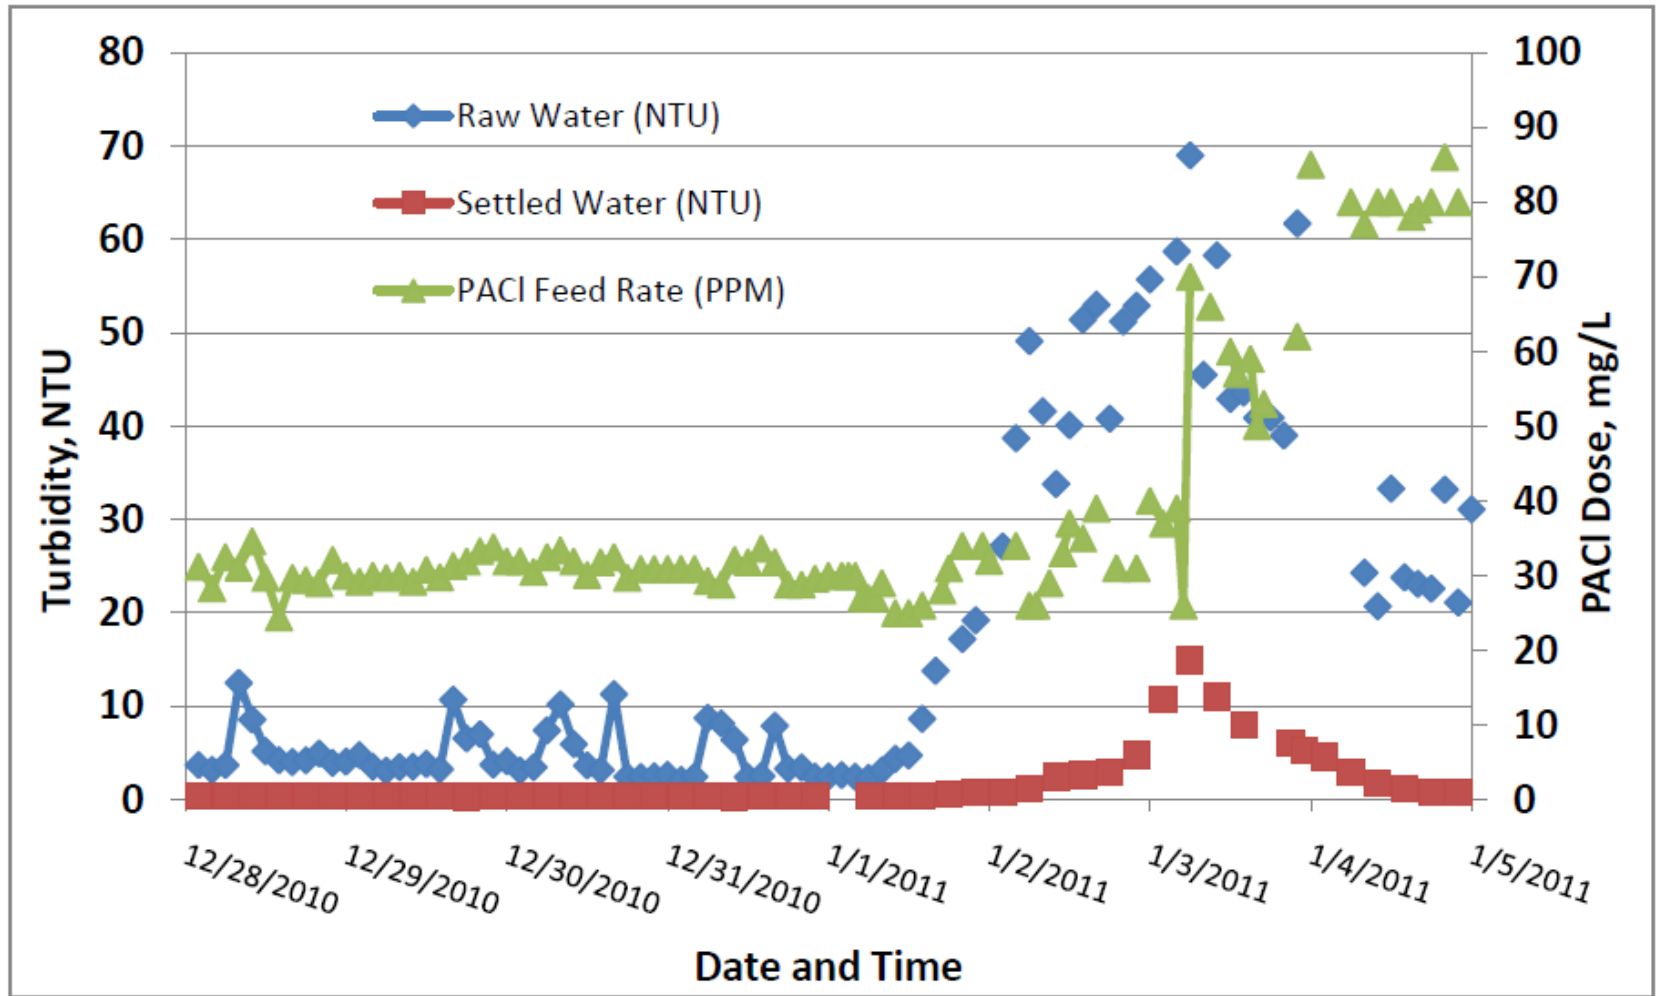

**Figure S2.** Data of turbidity of the raw water and the treated water, and the PACI feeding dose for the plant from Dec. 28, 2010 to Jan. 5, 2011

**Table S1.** Summary of concentrations of main elements in the river water.

| <b>Item</b> | <b>Level (mg·L<sup>-1</sup>)</b> | <b>Item</b> | <b>Level (mg·L<sup>-1</sup>)</b> | <b>Item</b> | <b>Level (mg·L<sup>-1</sup>)</b> |
|-------------|----------------------------------|-------------|----------------------------------|-------------|----------------------------------|
| Na          | 2.7924                           | Fe          | 0.002679                         | K           | 1.5050                           |
| Si          | 0.0477                           | Cu          | 0.003194                         | Mn          | 0.0011                           |
| AL          | 0.0016                           | Sn          | 0.003431                         | P           | 0.0048                           |
| Be          | 0.0001                           | B           | 0.0769                           | Li          | 0.0014                           |
| Pb          | 0.0006                           | Ni          | 0.031317                         | Ba          | 0.0255                           |
| Co          | 0.0002                           | Sb          | 0.001864                         | Mo          | 0.0080                           |
| Ag          | 0.0003                           | As          | 0.00146                          | Sr          | 0.0220                           |
| Cr          | 0.0005                           | V           | NA                               | Cd          | 0.0001                           |
| Zn          | NA                               | Se          | NA                               |             |                                  |
